# Supplementary material
Source: PubMed Central journal article supplement (PMC7577168)
Supplement: AAC.00363-20-s0001.pdf [file AAC.00363-20-s0001.pdf]

**Table S1.** RFB susceptibility profile of the *M. abscessus* 104536<sup>T</sup> S and R strains in different broth media at 30 °C. Results are representative of 3 independent experiments.

| Medium     | MIC (µg/mL)   |               |
|------------|---------------|---------------|
|            | CIP104536 (S) | CIP104536 (R) |
| CaMHB      | 100           | 12.5          |
| 7H9        | 25            | 6.25          |
| 7H9 + OADC | 50            | 50            |
| Sauton     | 25            | 25            |

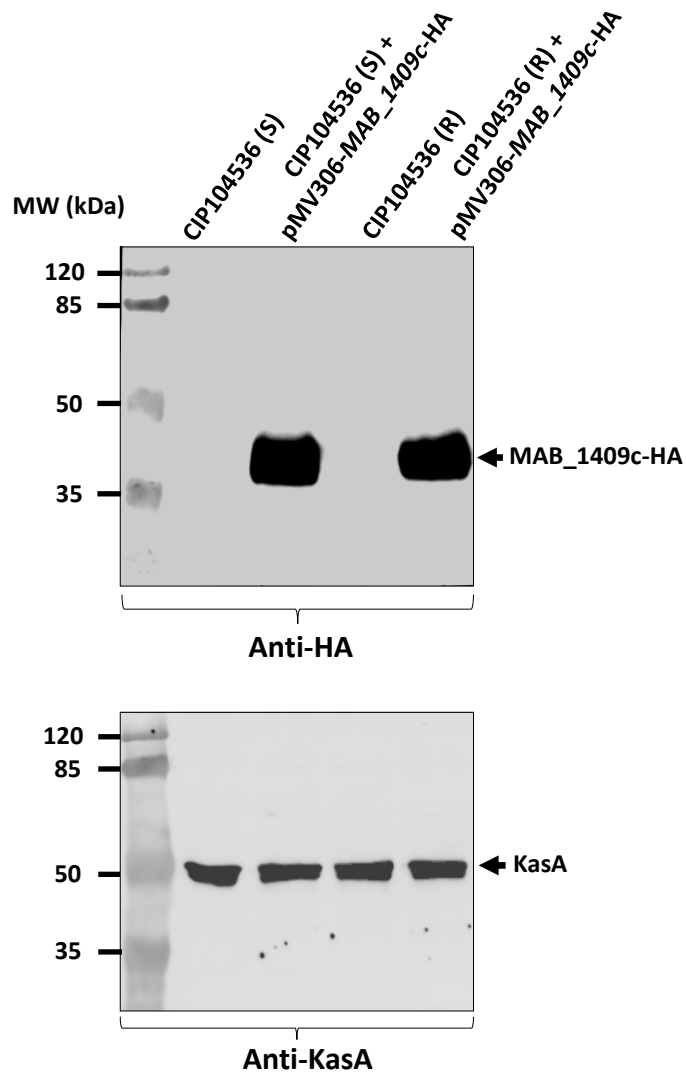

**Figure S1. Overexpression of MAB\_1409c-HA in *M. abscessus*.** The *MAB\_1409c* gene was fused to HA and expressed under the control of *hsp60* promoter. Western blot analysis of MAB\_1409c overexpression in the CIP104536 S and R variants using anti-HA antibodies (upper panel). The KasA protein (probed with anti-KasA antibodies) was used as a loading control (lower panel).

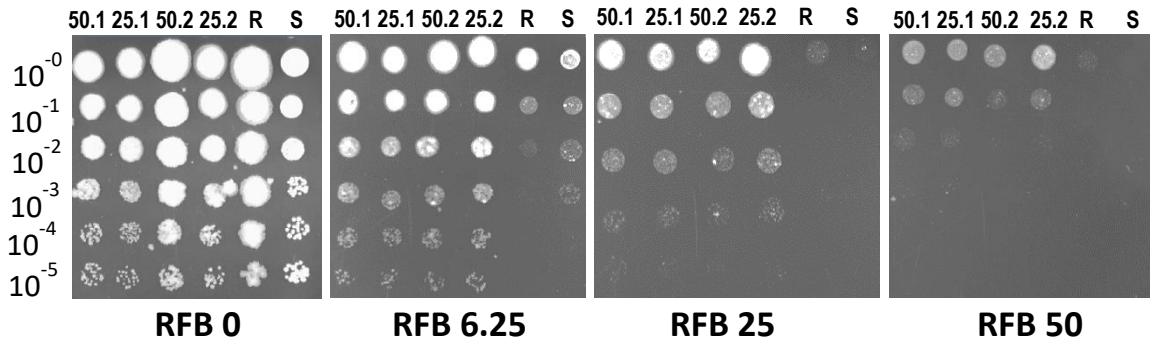

**Figure S2. Drug susceptibility phenotypes of *M. abscessus* to RFB.** Four microliter of 10-fold serially diluted bacterial suspension of exponentially growing cultures of S and R wild-type strains and resistant strains (50.1, 25.1, 50.2 and 25.2) derived from the R variant were spotted on Middlebrook 7H10 plates supplemented with OADC enrichment in the absence or presence of RFB (6.25 to 50  $\mu\text{g}/\text{mL}$ ). Plates were incubated at 37°C for 4 days.

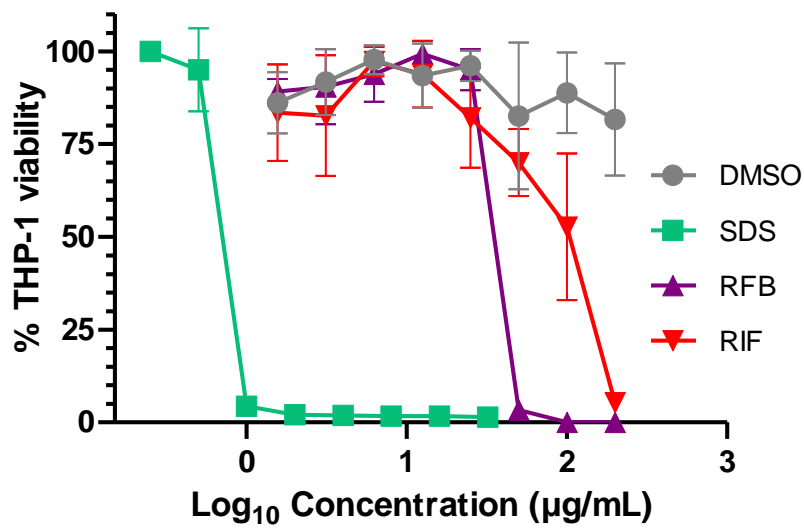

**Figure S3. Cytotoxicity assay of rifabutin (RFB) and Rifampicin (RIF) on THP-1 differentiated macrophages.** Cells were differentiated with PMA for 48 hrs and exposed to increasing concentration of either RFB or RIF (starting at 200 µg/mL) for an additional 72 hrs at 37°C with 5% CO<sub>2</sub>. SDS was used as a positive control and DMSO as negative control. Results are representative of 3 independent experiments done in duplicate. CC<sub>50</sub> SDS is 0.6 g/mL, CC<sub>50</sub> RFB is 33.6 µg/mL and CC<sub>50</sub> RIF is 82.6 µg/mL.
